# Supplementary material for: Potentiometric detection of biogenic amines utilizing affinity on a 4-mercaptobenzoic acid monolayer
Source: Royal Society of Chemistry journal article supplement (doi:10.1039/c8ay02616e), 2019-01-01
Supplement: c8ay02616e1.pdf [file c8ay02616e1.pdf]

## Supplementary Information

# Potentiometric detection of biogenic amines utilizing affinity on a 4-mercaptobenzoic acid monolayer

Tsukuru Minamiki\* and Ryoji Kurita\*

---

Biomedical Research Institute, National Institute of Advanced Industrial Science and Technology (AIST), DAILAB, and DAICENTER, 1-1-1 Higashi, Tsukuba, Ibaraki, 305-8566 Japan.

E-mail: t.minamiki@aist.go.jp; r.kurita@aist.go.jp

## Contents

|                                                                             |           |
|-----------------------------------------------------------------------------|-----------|
| <b>General</b>                                                              | <b>S2</b> |
| <b>Estimation of the limit of detection and the limit of quantification</b> | <b>S3</b> |
| <b>Potentiometric titrations under different pH conditions</b>              | <b>S4</b> |
| <b>Reference</b>                                                            | <b>S7</b> |

## General

All reagents and solvents were used without purifications. Methanol (CAS: 67-56-1), hydrochloric acid (CAS: 7647-01-0), sodium hydroxide (CAS: 1310-73-2), and sodium chloride (CAS: 7647-14-5) were purchased from FUJIFILM Wako Pure Chemical Corp. A glass substrate (model: Eagle XG) was purchased from Corning, Inc. Histamine dihydrochloride (CAS: 56-92-8), L-histidine hydrochloride monohydrate (CAS: 5934-29-2), 1,5-diaminopentane dihydrochloride (cadaverine) (CAS: 1476-39-7), L-lysine dihydrochloride (CAS: 657-26-1), and 4-mercaptobenzoic acid (BA) (CAS: 1074-36-8) were purchased from Tokyo Chemical Industry Co., Ltd. 2-Morpholinoethanesulfonic acid monohydrate (MES) (CAS: 145224-94-8) was purchased from Dojindo Laboratories. The analyte solutions were prepared using Milli-Q water (18 M $\Omega$  cm at 25 °C).

Gold (Au) metal electrodes were prepared by using a multi-source resistance-heating evaporation system (model: KIS3) from Biemtron Co., Ltd. UV ozone treatment was performed on an UV/ozone processing unit (model: SSP16-110) from SEN LIGHTS Corp. The pH values of solution were measured by a pH meter (model: HM-30G) from DKK-TOA Corp. Potentiometric measurements were carried out using a potentiostat equipment (model: 1200C) from ALS Co., Ltd. The Ag/AgCl electrode (model: RE-1B) as the reference electrode was purchased from BAS, Inc. X-ray photoelectron spectroscopy (XPS) measurements were performed using an AXIS Nova surface analysis spectrometer with AlK $\alpha$  radiation from KRATOS Analytical Ltd. Contact angle goniometry (CAG) measurements were carried out using a droplet contact angle meter (model: DMO-501) from Kyowa Interface Science Co., Ltd.

### **Estimation of the limit of detection (LOD) and the limit of quantitation (LOQ)**

For the determination of the limit of detection (LOD) and the limit of quantitation (LOQ) to histamine (Fig. 3), the intersection of the minimum signal ( $=Y$ ) and the regression line obtained from the value of  $V$  in the dynamic range of the titration curve allowed us to estimate the values of the LOD and the LOQ. The value of  $Y$  is estimated by the following Equation (1):

$$Y = V + k\sigma \quad (1)$$

$V$  and  $\sigma$  are the average value and the standard deviation of the electrode potential in the absence of histamine, respectively. LOD:  $k = 3$ , LOQ:  $k = 10$ .

### Potentiometric titrations under different pH conditions

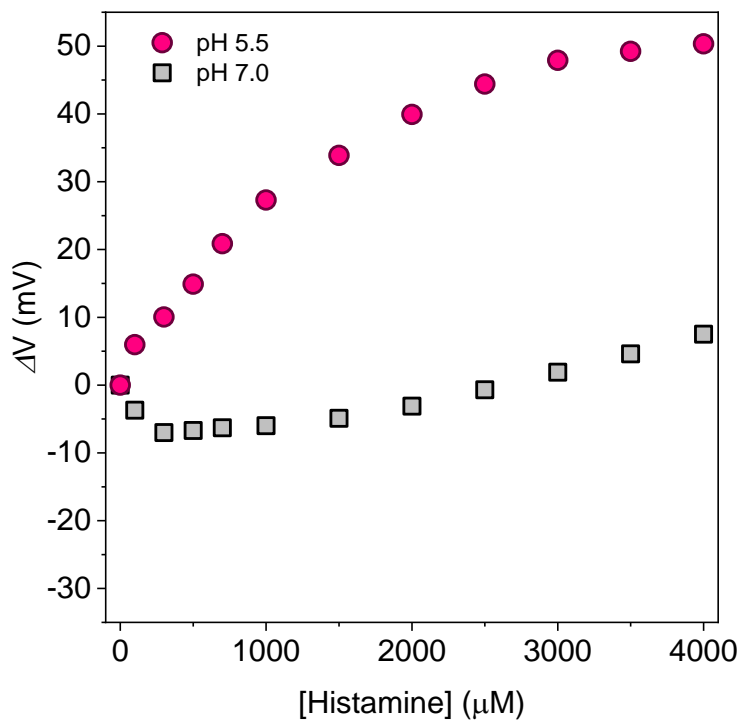

**Fig. S1** Potentiometric responses of the BA-SAM modified electrode upon addition of histamine in a MES buffer solution (100 mM) with NaCl (100 mM) with pH 5.5 or pH 7.0, at 27°C.

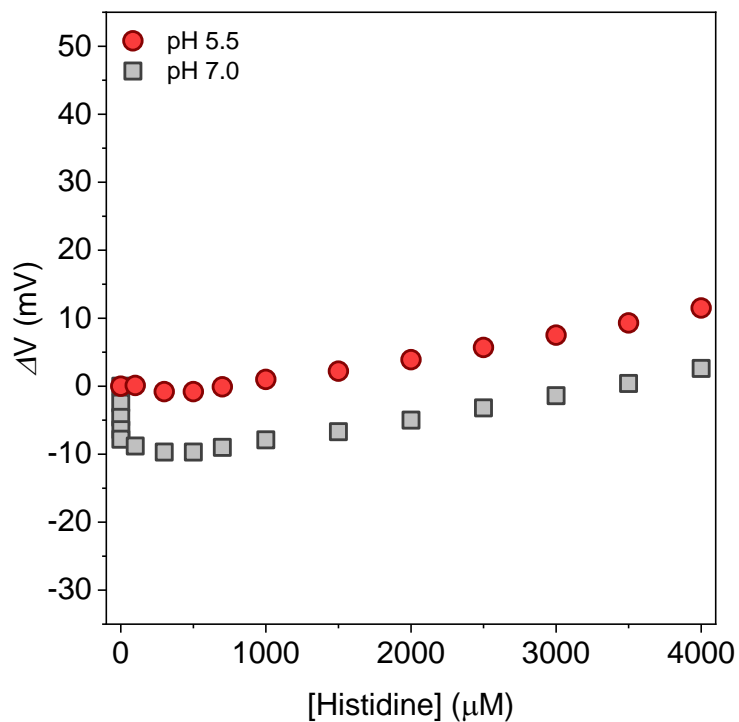

**Fig. S2** Potentiometric responses of the BA-SAM modified electrode upon addition of histidine in a MES buffer solution (100 mM) with NaCl (100 mM) with pH 5.5 or pH 7.0, at 27°C.

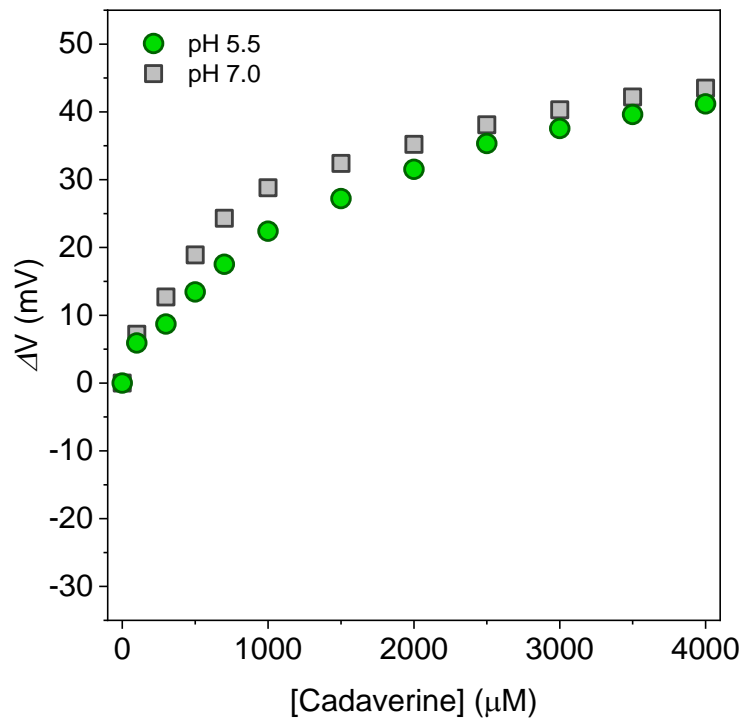

**Fig. S3** Potentiometric responses of the BA-SAM modified electrode upon addition of cadaverine in a MES buffer solution (100 mM) with NaCl (100 mM) with pH 5.5 or pH 7.0, at 27°C.

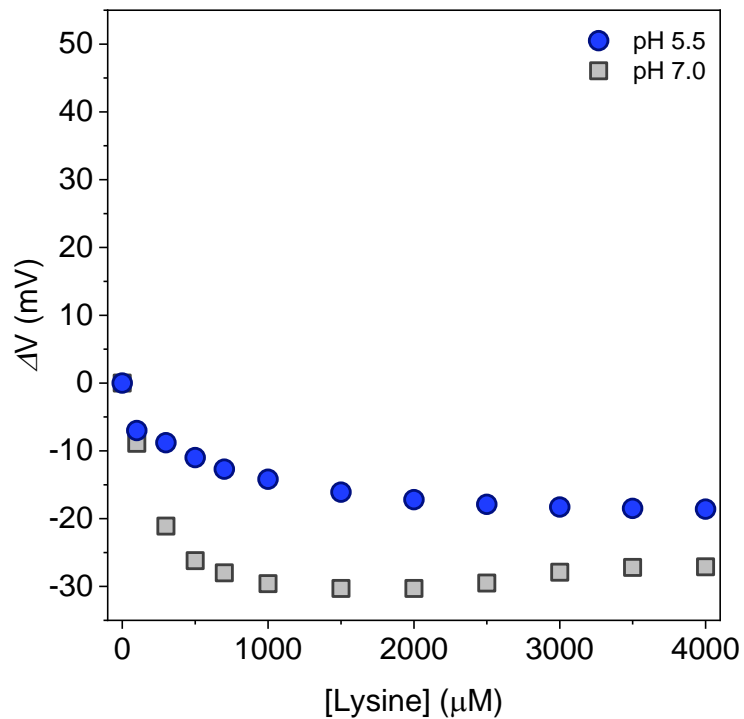

**Fig. S4** Potentiometric responses of the BA-SAM modified electrode upon addition of lysine in a MES buffer solution (100 mM) with NaCl (100 mM) with pH 5.5 or pH 7.0, at 27°C.

#### Reference

- 1 J. N. Miller and J. C. Miller, *Statistics and Chemometrics for Analytical Chemistry*, Pearson, Harlow, UK, 6th edn, 2010.
